# Supplementary material for: Li adsorption, hydrogen storage and dissociation using monolayer MoS2: an ab initio random structure searching approach
Source: Royal Society of Chemistry journal article supplement (doi:10.1039/c5cp00977d), 2015-01-01
Supplement: c5cp00977d1.pdf [file c5cp00977d1.pdf]

# Li adsorption, hydrogen storage and dissociation using monolayer MoS<sub>2</sub>: An ab-initio random structure searching approach

Darwin Barayang Putungan,<sup>1,2,3</sup> Shi-Hsin Lin,<sup>3</sup> Ching-Ming Wei,<sup>3</sup> and Jer-Lai Kuo<sup>3</sup>

<sup>1</sup>*Department of Physics, National Taiwan University, Taipei, Taiwan*

<sup>2</sup>*TIGP Nanoscience and Technology program,*

*Institute of Physics, Academia Sinica, Taipei, Taiwan*

<sup>3</sup>*Institute of Atomic and Molecular Sciences, Academia Sinica, Taipei, Taiwan*

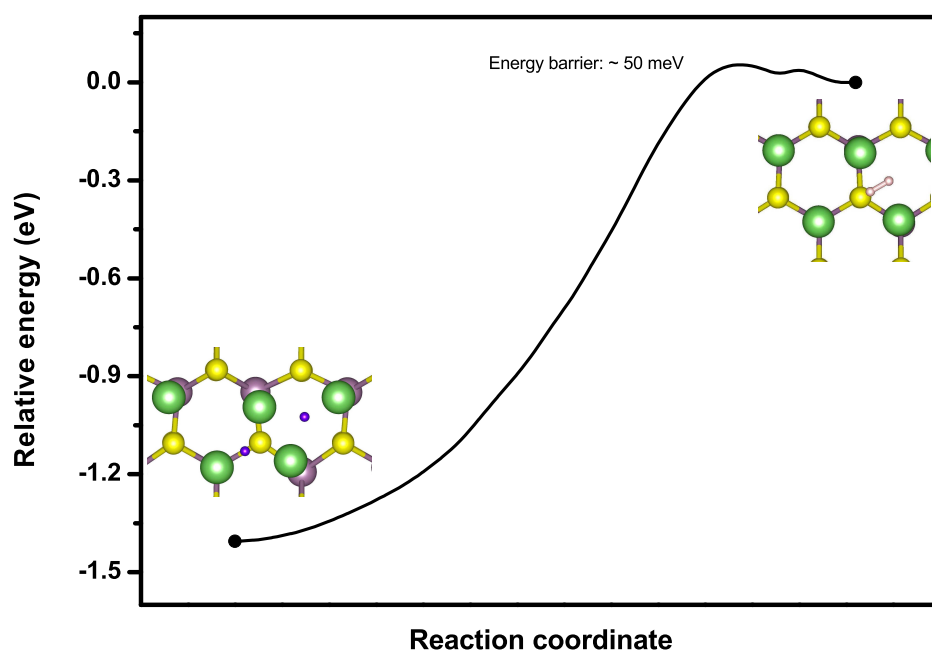

FIG. S1: Path (A) as was shown in Figure 8 detailing the onset of hydrogen molecule dissociation into two triply-coordinated H atoms with Li. An energy barrier of approximately 50 meV was obtained.
